# Supplementary material for: Architecture of the Sema3A/PlexinA4/Neuropilin tripartite complex
Source: PubMed Central journal article supplement (PMC8155012; doi:10.1038/s41467-021-23541-x), 2021-05-26
Supplement: 41467_2021_23541_MOESM3_ESM.pdf [file 41467_2021_23541_MOESM3_ESM.pdf]

## **Description of Additional Supplementary Files**

**Title:** Supplementary Movie 1

**Description:** Overall assembly of the Sema3A/PlexinA4/Nrp1 complex
